# Supplementary material for: RADIX: rhizoslide platform allowing high throughput digital image analysis of root system expansion
Source: PubMed Central journal article supplement (PMC5011878; doi:10.1186/s13007-016-0140-8), 2016-09-05
Supplement: 13007_2016_140_MOESM2_ESM.pdf [file 13007_2016_140_MOESM2_ESM.pdf]

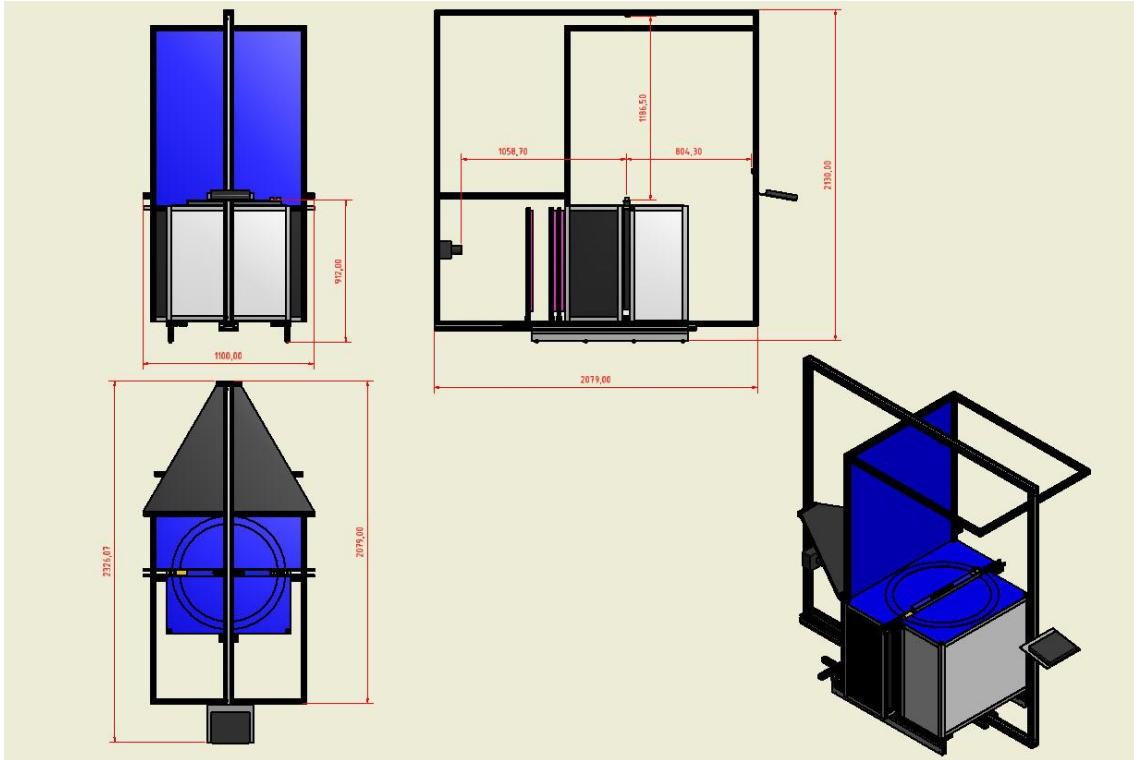

Additional file 2: Constructional drawing of the imaging station (units:mm).
