# Supplementary material for: RADIX: rhizoslide platform allowing high throughput digital image analysis of root system expansion
Source: PubMed Central journal article supplement (PMC5011878; doi:10.1186/s13007-016-0140-8), 2016-09-05
Supplement: 13007_2016_140_MOESM5_ESM.pdf [file 13007_2016_140_MOESM5_ESM.pdf]

Additional file 5: A) Best linear unbiased prediction (BLUPS) of parameters with significant treatment effect, but no genotype effect or genotype: treatment interaction. B) Prediction of mean values of parameters with significant genotype effect, but no genotype: treatment interaction. C) Prediction of mean values of parameters with significant genotype: treatment interaction.

Abbreviations: Number of lateral roots in the first segment ( $No_{Lat} 1^{st}$ ) or second segment ( $No_{Lat} 2^{nd}$ ), length of representative lateral root in the first segment ( $Med_{Lat} 1^{st}$ ) or second segment ( $Med_{Lat} 2^{nd}$ ), maximal lateral root length in the first segment ( $Max_{Lat} 1^{st}$ ) or in the second segment ( $Max_{Lat} 2^{nd}$ ), elongation rate crown roots ( $ER_{Cr}$ ), length of crown roots at solution change (intercept;  $IC_{Cr}$ ), embryonic root dry weight ( $DW_{ER}$ ), crown root dry weight ( $DW_{CR}$ ), chlorophyll measurements (SPAD, measured leaf area ( $LA_m$ ), shoot dry weight ( $DW_S$ ), number of pixels specifying the leaf area ( $LA_{Pix}$ ), shoot pixel count at solution change (intercept;  $IC_S$ ), shoot pixel count development ( $ER_S$ ), N content in the leaf in % of total dry weight (N in %).

**A**

| <b>Treatment</b> | <b>Br<sub>Lat</sub>1<sup>st</sup></b><br><b>(lat cm<sup>-1</sup>)</b> | <b>Br<sub>Lat</sub>2<sup>nd</sup></b><br><b>(lat cm<sup>-1</sup>)</b> | <b>DW<sub>ER</sub></b><br><b>(mg)</b> |
|------------------|-----------------------------------------------------------------------|-----------------------------------------------------------------------|---------------------------------------|
| <b>High</b>      | 2.12                                                                  | 1.81                                                                  | 28.76                                 |
| <b>Low</b>       | 1.79                                                                  | 1.34                                                                  | 21.50                                 |
| <b>HSD</b>       | 0.69                                                                  | 0.58                                                                  | 6.02                                  |
| <b>avsed</b>     | 0.35                                                                  | 0.29                                                                  | 3.05                                  |

B

| Genotype    | Max <sub>Lat</sub> 2 <sup>nd</sup><br>(cm) | No <sub>Lat</sub> 1 <sup>st</sup><br>(count) | No <sub>Lat</sub> 2 <sup>nd</sup><br>(count) | IC <sub>S</sub><br>(Pixel) | ER <sub>S</sub><br>(cm <sup>2</sup> ) | LA <sub>Pix</sub><br>(Pixel) | LA <sub>m</sub><br>(cm) | DW <sub>S</sub><br>(g) | N<br>(%)    |
|-------------|--------------------------------------------|----------------------------------------------|----------------------------------------------|----------------------------|---------------------------------------|------------------------------|-------------------------|------------------------|-------------|
| A347        | 1.86                                       | 49.70                                        | 32.41                                        | 1282                       | 1914                                  | 22331                        | 105.73                  | 0.25                   | 3.76        |
| B100        | 1.70                                       | 42.83                                        | 37.18                                        | 1844                       | 1191                                  | 13878                        | 81.32                   | 0.18                   | 4.30        |
| B97         | 1.24                                       | 30.79                                        | 25.52                                        | 1301                       | 1434                                  | 16879                        | 87.96                   | 0.21                   | 5.03        |
| EC169       | 1.42                                       | 38.20                                        | 33.11                                        | 1220                       | 1098                                  | 13360                        | 76.01                   | 0.18                   | 4.31        |
| EZ11A       | 1.84                                       | 37.17                                        | 32.53                                        | 1561                       | 1383                                  | 16711                        | 86.14                   | 0.21                   | 4.78        |
| EZ37        | 1.87                                       | 48.24                                        | 36.39                                        | 925                        | 1495                                  | 17240                        | 87.45                   | 0.19                   | 4.03        |
| EZ47        | 1.37                                       | 45.86                                        | 32.07                                        | 1097                       | 1268                                  | 14662                        | 81.34                   | 0.19                   | 4.40        |
| F1808       | 1.35                                       | 37.08                                        | 26.11                                        | 1342                       | 1344                                  | 15960                        | 81.30                   | 0.19                   | 4.37        |
| F7028       | 1.49                                       | 39.13                                        | 29.03                                        | 1337                       | 1054                                  | 12401                        | 71.75                   | 0.17                   | 4.15        |
| F98902      | 1.41                                       | 38.04                                        | 32.47                                        | 1052                       | 1368                                  | 16012                        | 79.52                   | 0.19                   | 4.61        |
| FC1890      | 1.38                                       | 31.13                                        | 28.70                                        | 1323                       | 1328                                  | 15382                        | 83.54                   | 0.20                   | 4.49        |
| FV353       | 1.89                                       | 46.24                                        | 37.72                                        | 1118                       | 1198                                  | 15339                        | 82.39                   | 0.20                   | 4.02        |
| LAN496      | 1.44                                       | 31.96                                        | 26.99                                        | 1998                       | 1881                                  | 21352                        | 107.32                  | 0.27                   | 3.81        |
| LH38        | 1.71                                       | 43.78                                        | 36.63                                        | 1012                       | 1444                                  | 16729                        | 86.58                   | 0.20                   | 4.26        |
| Mo17        | 1.32                                       | 29.43                                        | 22.23                                        | 1480                       | 1729                                  | 20066                        | 108.18                  | 0.26                   | 4.31        |
| MS153       | 1.63                                       | 32.61                                        | 26.54                                        | 907                        | 1245                                  | 14473                        | 76.85                   | 0.18                   | 4.12        |
| MS71        | 1.40                                       | 40.12                                        | 31.46                                        | 887                        | 1465                                  | 16318                        | 87.69                   | 0.21                   | 4.43        |
| N25         | 1.62                                       | 36.24                                        | 32.12                                        | 1693                       | 1525                                  | 18336                        | 96.99                   | 0.22                   | 4.23        |
| N6          | 2.02                                       | 41.67                                        | 33.40                                        | 1027                       | 1466                                  | 16556                        | 84.29                   | 0.20                   | 5.07        |
| Oh33        | 1.87                                       | 50.03                                        | 41.37                                        | 1651                       | 1023                                  | 12261                        | 72.11                   | 0.17                   | 3.90        |
| (RootABA1-) | 1.67                                       | 33.23                                        | 31.97                                        | 1781                       | 1617                                  | 19832                        | 97.54                   | 0.25                   | 4.22        |
| (RootABA1+) | 2.16                                       | 39.13                                        | 31.86                                        | 1344                       | 1683                                  | 19913                        | 99.99                   | 0.24                   | 4.69        |
| PH207       | 1.84                                       | 39.19                                        | 36.83                                        | 1717                       | 1292                                  | 15623                        | 85.17                   | 0.20                   | 3.81        |
| W64A        | 1.77                                       | 32.71                                        | 32.06                                        | 527                        | 1774                                  | 20952                        | 95.12                   | 0.23                   | 3.61        |
| HSD         | <b>1.30</b>                                | <b>28.96</b>                                 | <b>23.22</b>                                 | <b>1883</b>                | <b>1190</b>                           | <b>12738</b>                 | <b>67.64</b>            | <b>0.17</b>            | <b>1.56</b> |
| avsed       | <b>0.35</b>                                | <b>7.79</b>                                  | <b>6.24</b>                                  | <b>499</b>                 | <b>315</b>                            | <b>3392</b>                  | <b>18.01</b>            | <b>0.05</b>            | <b>0.41</b> |

| C | Genotype           | ER <sub>Cr</sub> |      | Med <sub>Lat</sub> 1 <sup>st</sup> |      | Med <sub>Lat</sub> 2 <sup>nd</sup> |      | Max <sub>Lat</sub> 1 <sup>st</sup> |      | LBrZ  |       | DW <sub>CR</sub> |       |
|---|--------------------|------------------|------|------------------------------------|------|------------------------------------|------|------------------------------------|------|-------|-------|------------------|-------|
|   |                    | high             | low  | high                               | low  | high                               | low  | high                               | low  | high  | low   | high             | low   |
|   | <b>A347</b>        | 1.66             | 1.15 | 1.11                               | 0.38 | 0.77                               | 0.31 | 2.58                               | 1.14 | 76.29 | 72.11 | 35.94            | 21.70 |
|   | <b>B100</b>        | 1.77             | 1.21 | 1.14                               | 0.41 | 0.65                               | 0.45 | 2.25                               | 1.15 | 71.45 | 56.31 | 33.96            | 24.82 |
|   | <b>B97</b>         | 1.62             | 1.17 | 1.07                               | 0.35 | 0.48                               | 0.25 | 1.88                               | 0.60 | 60.48 | 52.06 | 33.08            | 19.78 |
|   | <b>EC169</b>       | 1.75             | 1.08 | 1.04                               | 0.32 | 0.64                               | 0.25 | 2.12                               | 0.72 | 72.73 | 63.88 | 39.62            | 17.06 |
|   | <b>EZ11A</b>       | 1.75             | 1.09 | 1.07                               | 0.35 | 0.54                               | 0.29 | 2.44                               | 1.24 | 76.94 | 54.72 | 41.89            | 18.67 |
|   | <b>EZ37</b>        | 1.66             | 1.20 | 1.16                               | 0.44 | 0.61                               | 0.37 | 2.41                               | 1.33 | 66.73 | 58.82 | 32.09            | 19.82 |
|   | <b>EZ47</b>        | 1.55             | 1.21 | 1.09                               | 0.37 | 0.57                               | 0.15 | 2.13                               | 0.61 | 70.66 | 59.57 | 34.27            | 15.79 |
|   | <b>F1808</b>       | 1.60             | 1.14 | 1.05                               | 0.33 | 0.48                               | 0.24 | 1.98                               | 0.71 | 68.43 | 58.92 | 32.26            | 19.03 |
|   | <b>F7028</b>       | 1.59             | 1.21 | 1.06                               | 0.34 | 0.54                               | 0.37 | 2.07                               | 0.91 | 68.26 | 55.84 | 30.76            | 18.77 |
|   | <b>F98902</b>      | 1.61             | 1.31 | 1.08                               | 0.36 | 0.53                               | 0.34 | 2.01                               | 0.81 | 62.27 | 61.54 | 32.68            | 26.43 |
|   | <b>FC1890</b>      | 1.66             | 1.13 | 1.09                               | 0.36 | 0.71                               | 0.27 | 2.05                               | 0.71 | 66.86 | 56.65 | 37.71            | 19.98 |
|   | <b>FV353</b>       | 1.68             | 1.17 | 1.15                               | 0.43 | 0.65                               | 0.36 | 2.50                               | 1.28 | 77.31 | 62.68 | 39.45            | 25.02 |
|   | <b>LAN496</b>      | 1.44             | 1.22 | 1.04                               | 0.32 | 0.47                               | 0.28 | 1.99                               | 0.88 | 70.24 | 63.71 | 35.90            | 25.64 |
|   | <b>LH38</b>        | 1.58             | 1.28 | 1.08                               | 0.36 | 0.59                               | 0.39 | 2.28                               | 1.13 | 63.22 | 57.39 | 29.92            | 32.98 |
|   | <b>Mo17</b>        | 1.61             | 1.23 | 1.05                               | 0.32 | 0.53                               | 0.25 | 1.96                               | 0.69 | 58.95 | 60.99 | 30.52            | 23.01 |
|   | <b>MS153</b>       | 1.60             | 1.10 | 1.10                               | 0.38 | 0.67                               | 0.31 | 2.42                               | 0.85 | 61.38 | 55.95 | 31.74            | 22.30 |
|   | <b>MS71</b>        | 1.67             | 1.17 | 1.11                               | 0.39 | 0.67                               | 0.21 | 2.13                               | 0.67 | 71.29 | 70.54 | 34.51            | 27.55 |
|   | <b>N25</b>         | 1.65             | 1.16 | 1.07                               | 0.35 | 0.54                               | 0.39 | 2.14                               | 1.10 | 63.03 | 47.30 | 34.75            | 21.90 |
|   | <b>N6</b>          | 1.70             | 1.15 | 1.19                               | 0.46 | 0.60                               | 0.54 | 2.47                               | 1.56 | 62.05 | 47.73 | 34.20            | 23.11 |
|   | <b>Oh33</b>        | 1.73             | 1.19 | 1.19                               | 0.46 | 0.84                               | 0.34 | 2.55                               | 1.19 | 81.21 | 67.94 | 40.78            | 27.84 |
|   | <b>(RootABA1-)</b> | 1.66             | 1.11 | 1.14                               | 0.42 | 0.57                               | 0.32 | 2.25                               | 1.09 | 67.36 | 57.01 | 37.07            | 35.50 |
|   | <b>(RootABA1+)</b> | 1.46             | 1.14 | 1.21                               | 0.49 | 0.58                               | 0.30 | 2.75                               | 1.56 | 78.19 | 59.13 | 34.75            | 28.95 |
|   | <b>PH207</b>       | 1.75             | 1.06 | 1.09                               | 0.37 | 0.60                               | 0.38 | 2.38                               | 1.30 | 75.47 | 63.35 | 38.90            | 18.88 |
|   | <b>W64A</b>        | 1.55             | 1.11 | 1.11                               | 0.39 | 0.65                               | 0.33 | 2.42                               | 1.11 | 64.55 | 54.72 | 41.46            | 21.80 |
|   | <b>HSD</b>         | 0.94             |      | 0.52                               |      | 0.58                               |      | 1.80                               |      | 61.37 |       | 35.59            |       |
|   | <b>avsed</b>       | 0.23             |      | 0.13                               |      | 0.14                               |      | 0.44                               |      | 15.05 |       | 8.74             |       |
