# Supplementary material for: RADIX: rhizoslide platform allowing high throughput digital image analysis of root system expansion
Source: PubMed Central journal article supplement (PMC5011878; doi:10.1186/s13007-016-0140-8), 2016-09-05
Supplement: 13007_2016_140_MOESM8_ESM.pdf [file 13007_2016_140_MOESM8_ESM.pdf]

Low N side

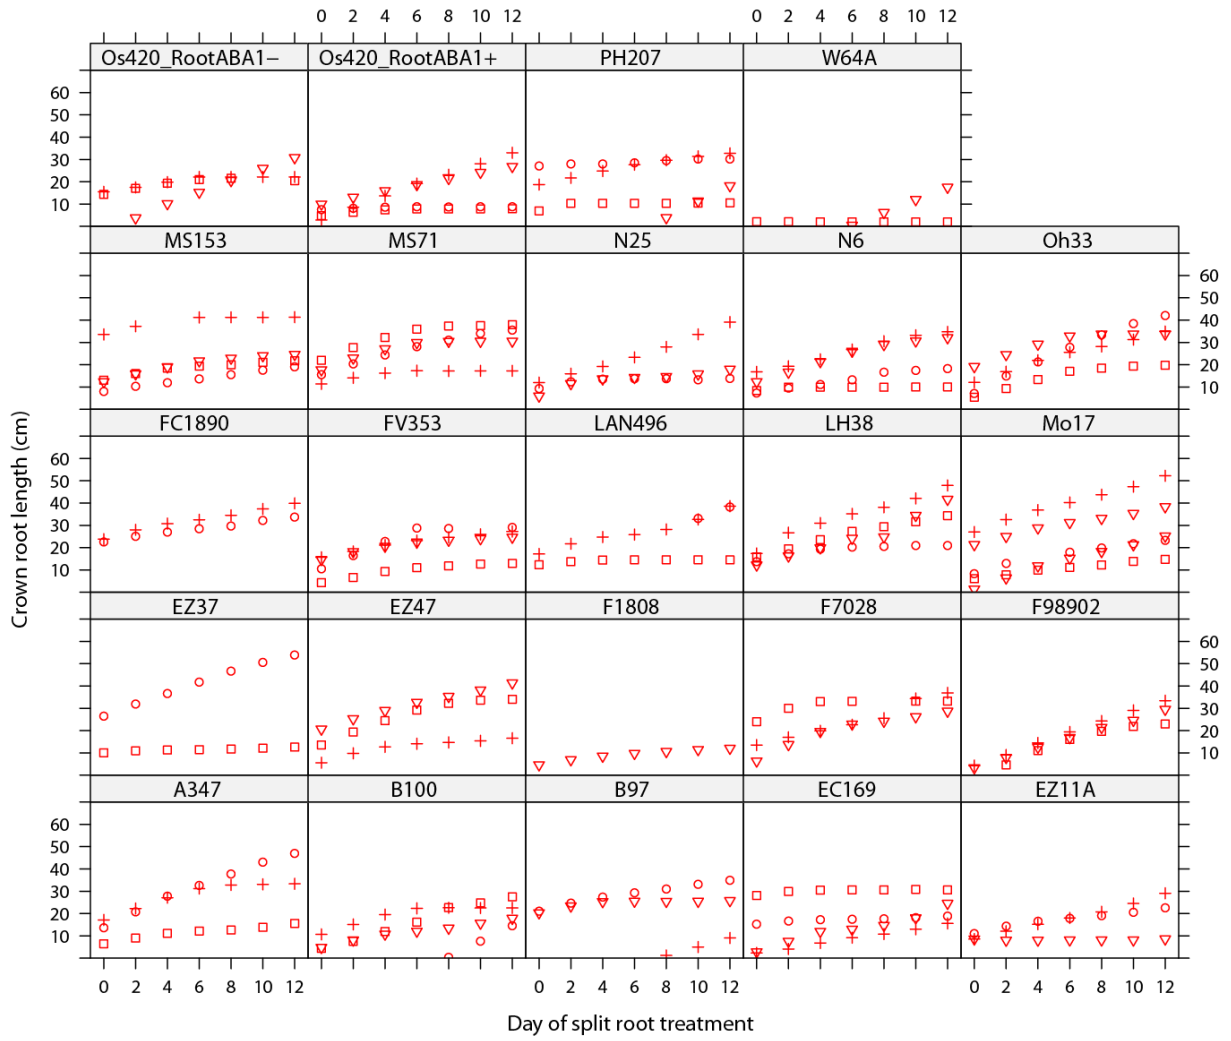

Additional file 8: Increase in crown root length of 24 genotypes under low nitrogen after the start of the split root treatment.
