# Supplementary material for: RADIX: rhizoslide platform allowing high throughput digital image analysis of root system expansion
Source: PubMed Central journal article supplement (PMC5011878; doi:10.1186/s13007-016-0140-8), 2016-09-05
Supplement: 13007_2016_140_MOESM10_ESM.pdf [file 13007_2016_140_MOESM10_ESM.pdf]

Increase lateral roots before lat\_0 per cm

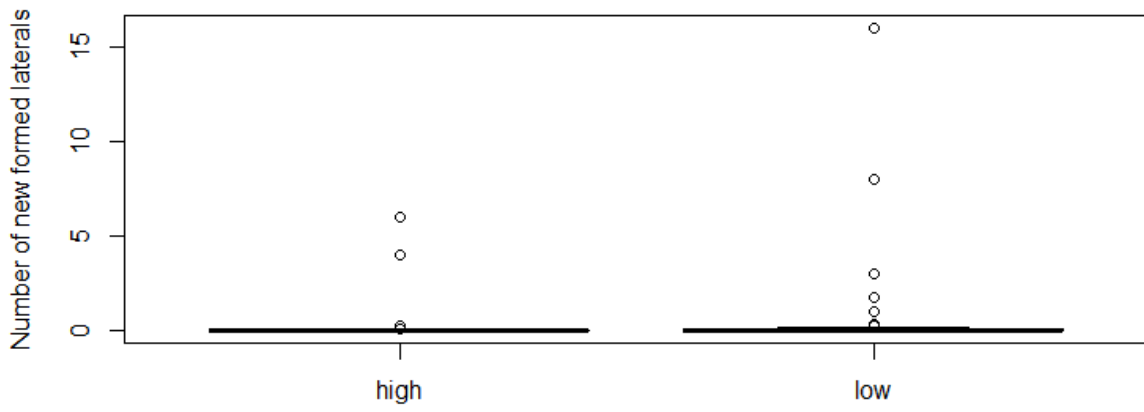

Increase lateral roots before lat\_0 per cm

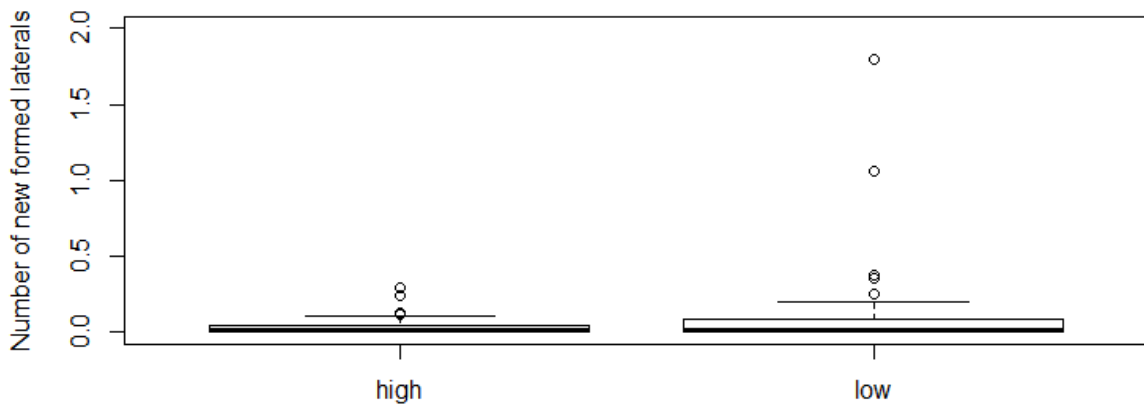

Additional file 10: Increase of lateral roots after solution change above the last formed lateral.
